# Supplementary material
Source: PubMed Central journal article supplement (PMC1073653)
Supplement: mbc_E04-03-0216_1.pdf [file mbc_E04-03-0216_1.pdf]

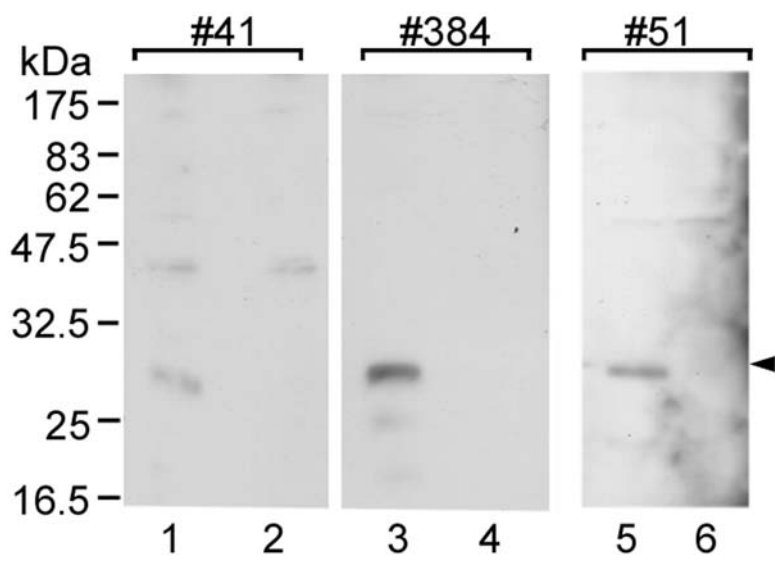

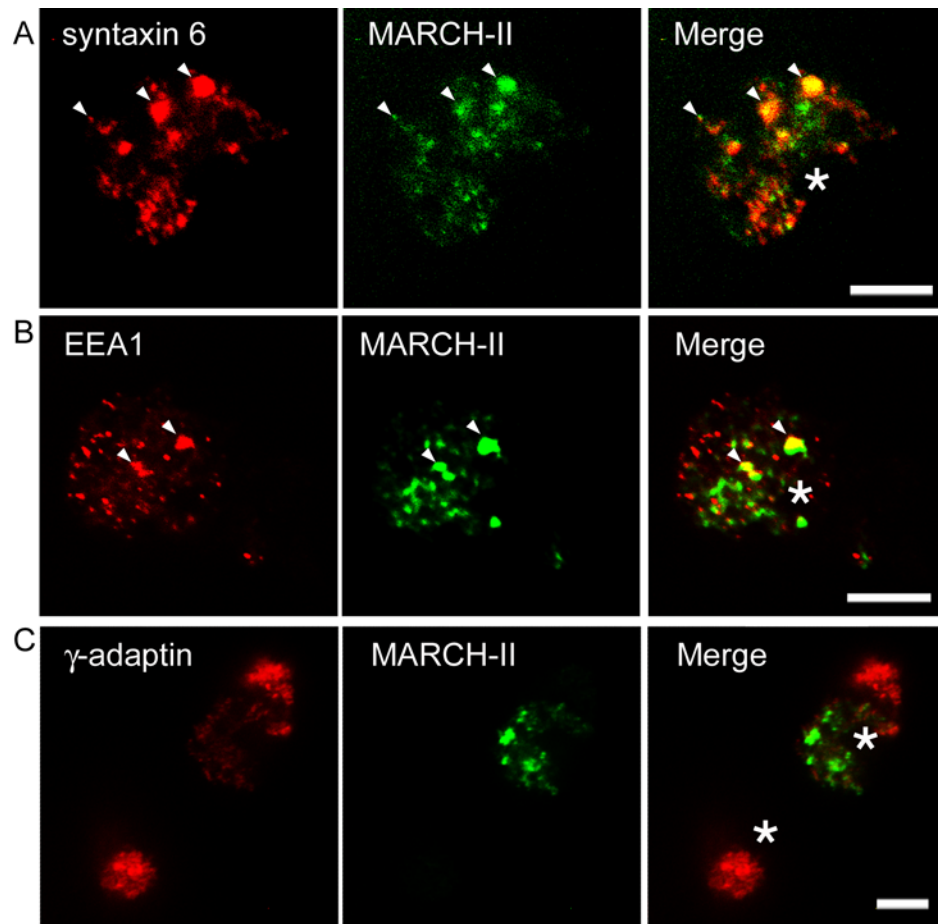

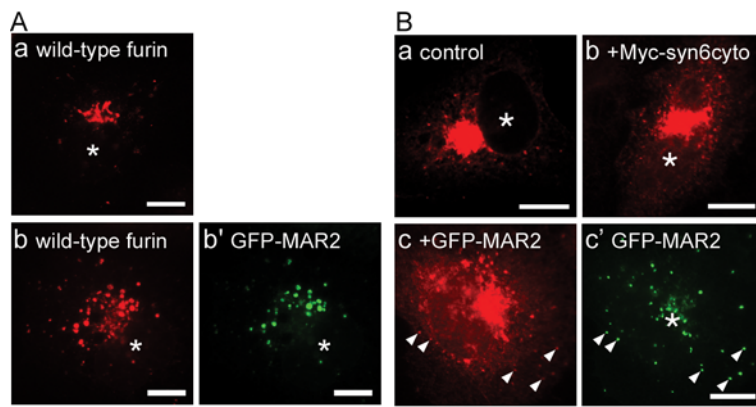

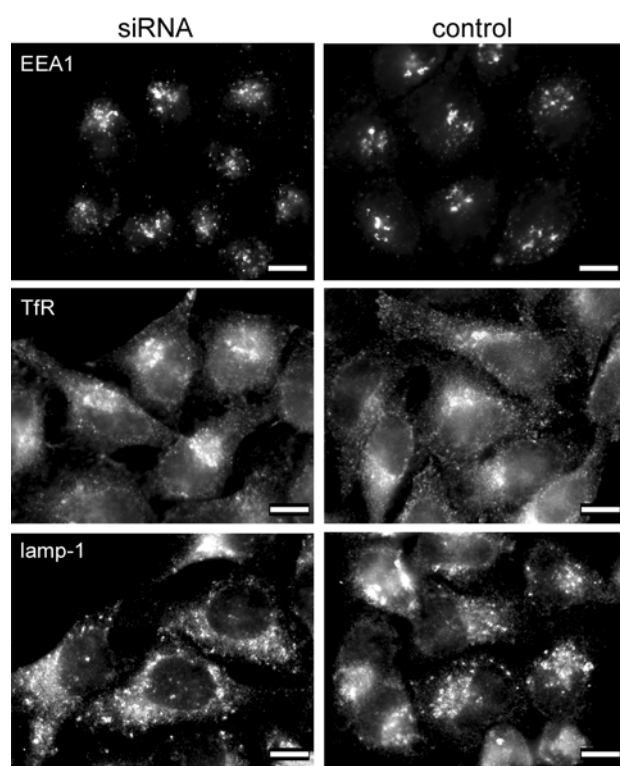

## Legends for Supplemental Figures

**Figure S1.** Antibody specificity. HeLa cells transfected with rat MARCH-II were homogenized in HBSS. After a high-speed centrifugation, the membrane pellet (lanes 1 and 3) and the cytosolic supernatant (lanes 2 and 4) were subjected to immunoblotting with affinity-purified anti-MAR2<sub>C</sub>#41 (lanes 1 and 2) and anti-MAR2<sub>N</sub>#384 (lanes 3 and 4). The membranes from HeLa cells transfected with rat MARCH-II (lane 5) or an empty vector (lane 6) were subjected to immunoblotting with affinity-purified anti-MAR2<sub>C</sub>#51. Each antibody detects MARCH-II protein of molecular mass ~27,000 (27 kDa; arrowhead).

**Figure S2.** Immunofluorescence analysis in CHO cells overexpressing MARCH-II. CHO cells overexpressing MARCH-II were fixed and stained with anti-MAR2<sub>C</sub>#41 and a mouse monoclonal antibody against either syntaxin 6 (A), EEA1 (B), or  $\gamma$ -adaptin (C) followed by Alexa 546-conjugated anti-rabbit IgG and Alexa 488-conjugated anti-mouse IgG. The signals were observed by confocal microscopy and those for MARCH-II and marker proteins are shown as green and red, respectively. Arrowheads indicate examples of colocalization of two proteins. Asterisks, position of nucleus. Bars, 10  $\mu$ m.

**Figure S3.** MARCH-II overexpression leads redistribution of wild-type furin but not MPR-Flag. (A) COS7 cells were transiently transfected with wild-type mouse furin alone (a) or together with GFP-MAR2 (b and b'). Cells were processed for immunofluorescence microscopy with rabbit polyclonal antibodies for furin followed by TRITC-conjugated anti-rabbit antibody. The signals for GFP and furin are shown as green and red, respectively. (B) COS7 cells were transiently transfected with MPR-Flag alone (a) or together with either Myc-syn6cyto (b) or GFP-MAR2 (c and c'). Cells were processed for immunofluorescence microscopy with anti-Flag antibody followed by Alexa 546-conjugated anti-mouse IgG. The signals for GFP and Flag are shown as green and red, respectively. Arrowheads indicate examples of colocalization of two proteins. Asterisks, position of nucleus. Bars, 10  $\mu$ m.

**Figure S4.** Immunofluorescence analysis in MARCH-II-suppressing cells. HeLa-TGN38

cells (right panels) and those expressing the MARCH-II shRNA (left panels) were fixed and stained with an antibody against EEA1 (top panels), TfR (middle panels), or lamp-1 (bottom panels) followed by Alexa 546-conjugated secondary antibody. Bars, 10  $\mu$ m.
